# Supplementary material
Source: PubMed Central journal article supplement (PMC4324731)
Supplement: NIHMS660278-supplement-ong_supplemenetal.pdf [file NIHMS660278-supplement-ong_supplemenetal.pdf]

# Supplementary Figure 1

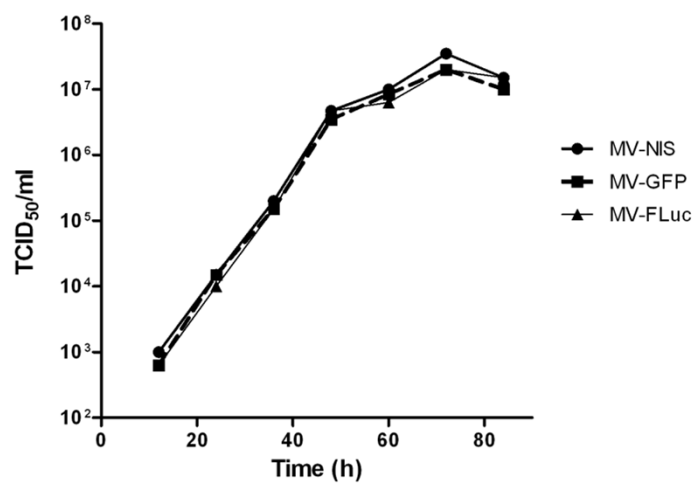

## Supplementary Figure 2

### Experiment 1

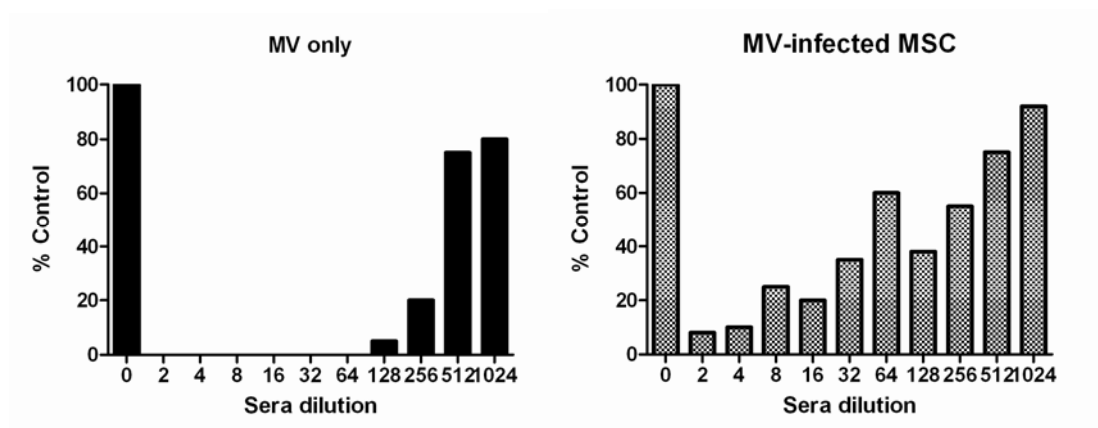

### Experiment 2

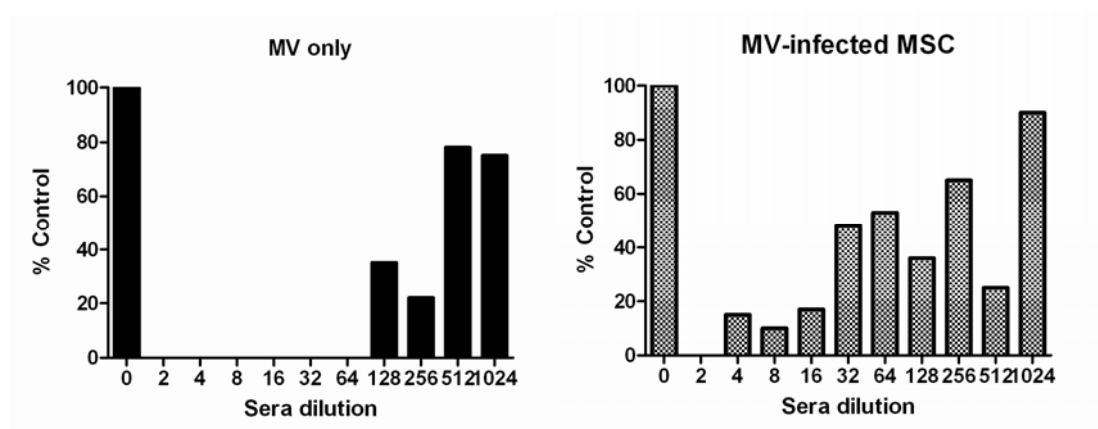

1 **Supplementary Fig. 1. One-step growth curves for MV-NIS, MV-GFP and MV-FLuc.**

2 To compare the growth characteristics of the various recombinant MV viruses, Vero cells  
3 were infected with the different viruses at an MOI of 3.0 for 2 hours at 37°C. After removing  
4 the virus inoculum, standard medium was added and the cells were maintained at 32°C. At  
5 12, 24, 36, 48, 60, 72 and 84 hours after infection, cells were scraped into 1 mL Opti-MEM  
6 and cell-associated viruses were released by two freeze-thaw cycles. Viral titers were  
7 determined with Vero cells by TCID<sub>50</sub> titration.

8

9 **Supplementary Fig. 2. Virus-infected MSCs, but not cell-free virus, were protected from**  
10 **the inhibitory effects of measles immune serum in-vitro.** MV or MV-infected MSCs were  
11 exposed to increasing dilutions of measles immune serum and overlaid on Vero cells. The  
12 numbers of syncytia were counted and represented as a percentage of numbers of syncytia  
13 found in wells with no serum. Results from two independent experiments are shown.

14
